# Supplementary material for: Development of a cognitive function marker based on D-amino acid proportions using new chiral tandem LC-MS/MS systems
Source: PubMed Central journal article supplement (PMC6972825; doi:10.1038/s41598-020-57878-y), 2020-01-21
Supplement: 41598_2020_57878_MOESM1_ESM.pdf [file 41598_2020_57878_MOESM1_ESM.pdf]

# Development of a cognitive function marker based on D-amino acid proportions using new chiral tandem LC-MS/MS systems

Ren Kimura<sup>1\*</sup>, Hisashi Tsujimura<sup>1</sup>, Masaru Tsuchiya<sup>1</sup>, Satoko Soga<sup>2</sup>, Noriyasu Ota<sup>2</sup>, Atsushi Tanaka<sup>3</sup> & Hunkyung Kim<sup>4</sup>

## Supplementary Information

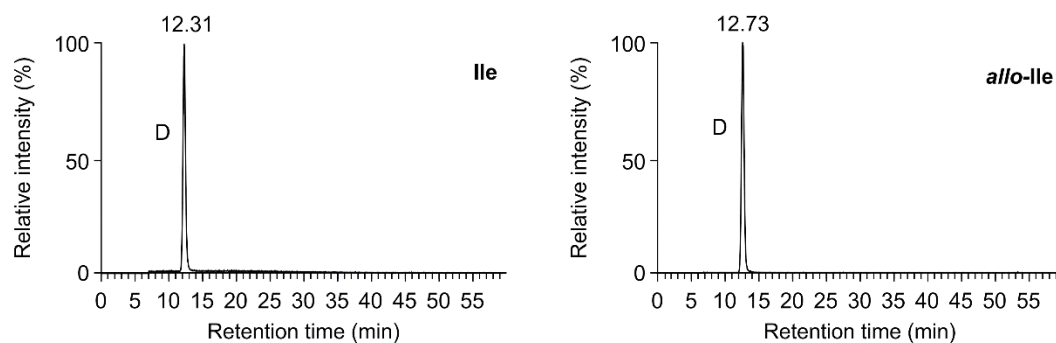

**Supplementary Figure 1.** Chromatograms of D-Ile and D-*allo*-Ile standards obtained using chiral tandem LC-MS/MS (QD-AX and ZWIX (-)).

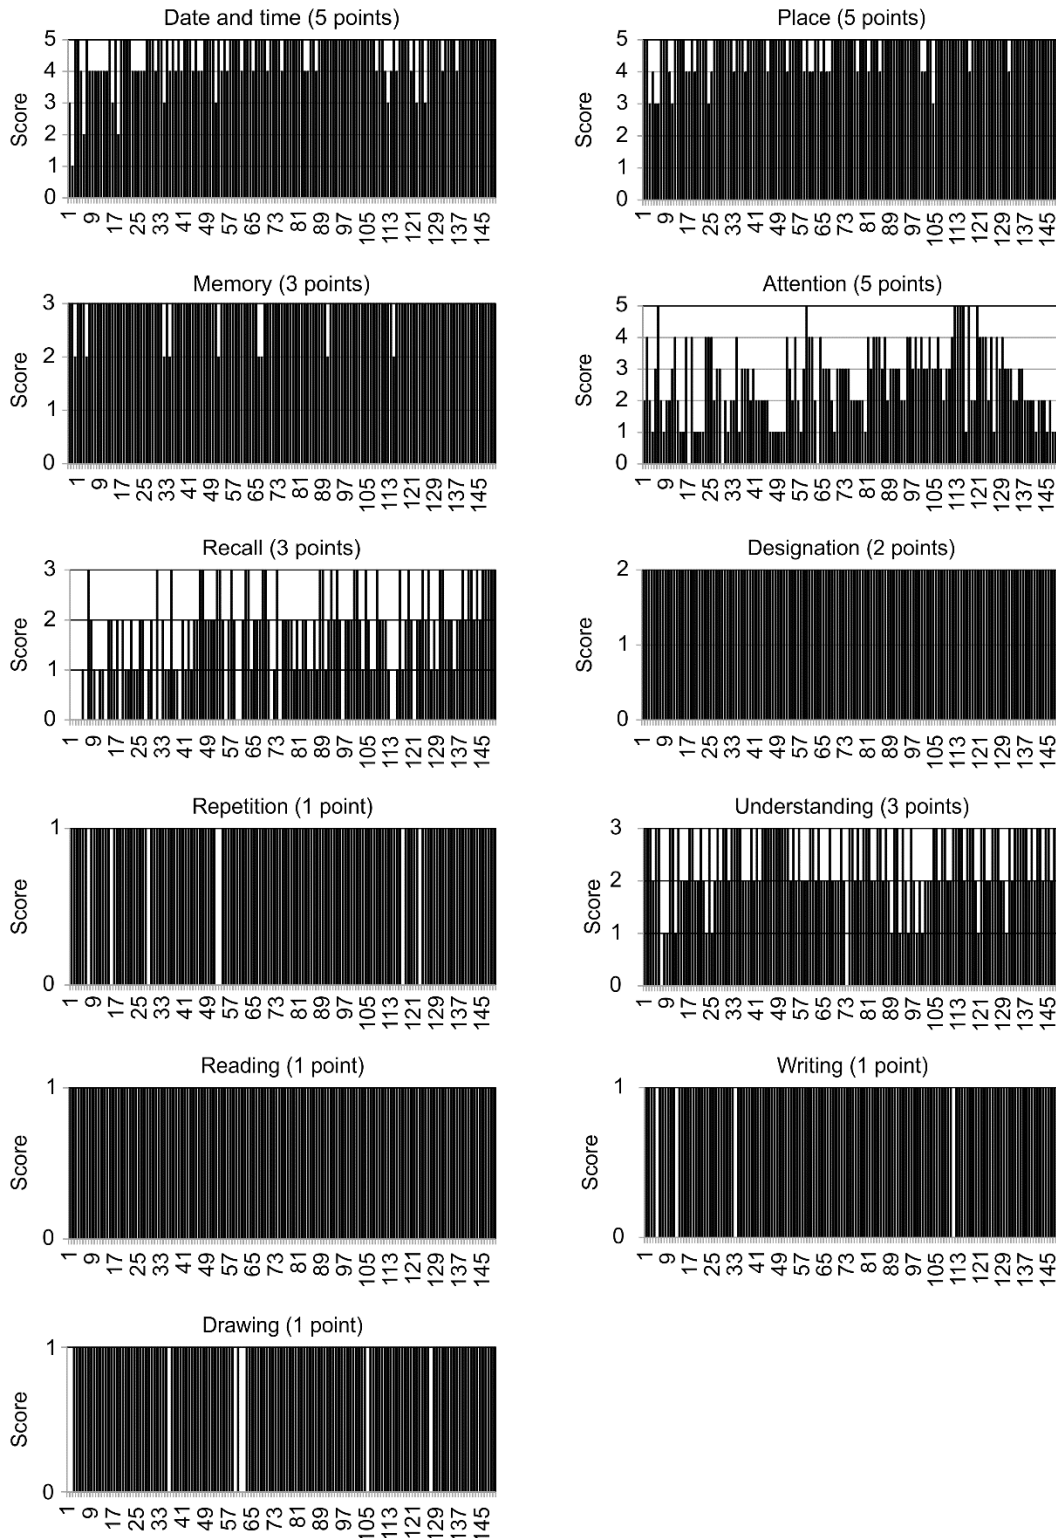

**Supplementary Figure 2.** Details of MMSE scores obtained in the MCI group (N = 149).

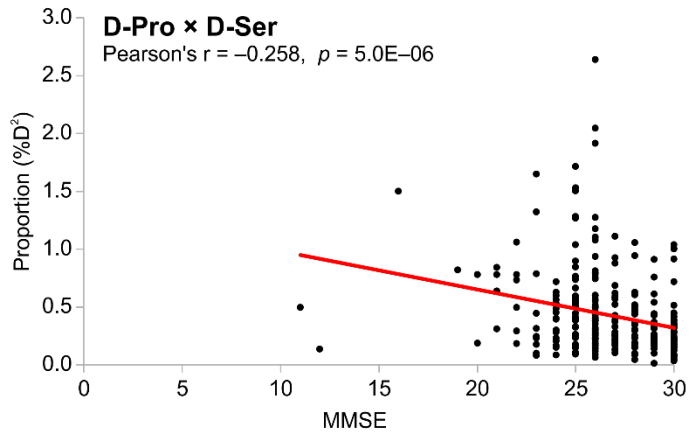

**Supplementary Figure 3.** Correlation between Mini-Mental State Examination (MMSE) score and multiplied proportion (D-Pro × D-Ser).

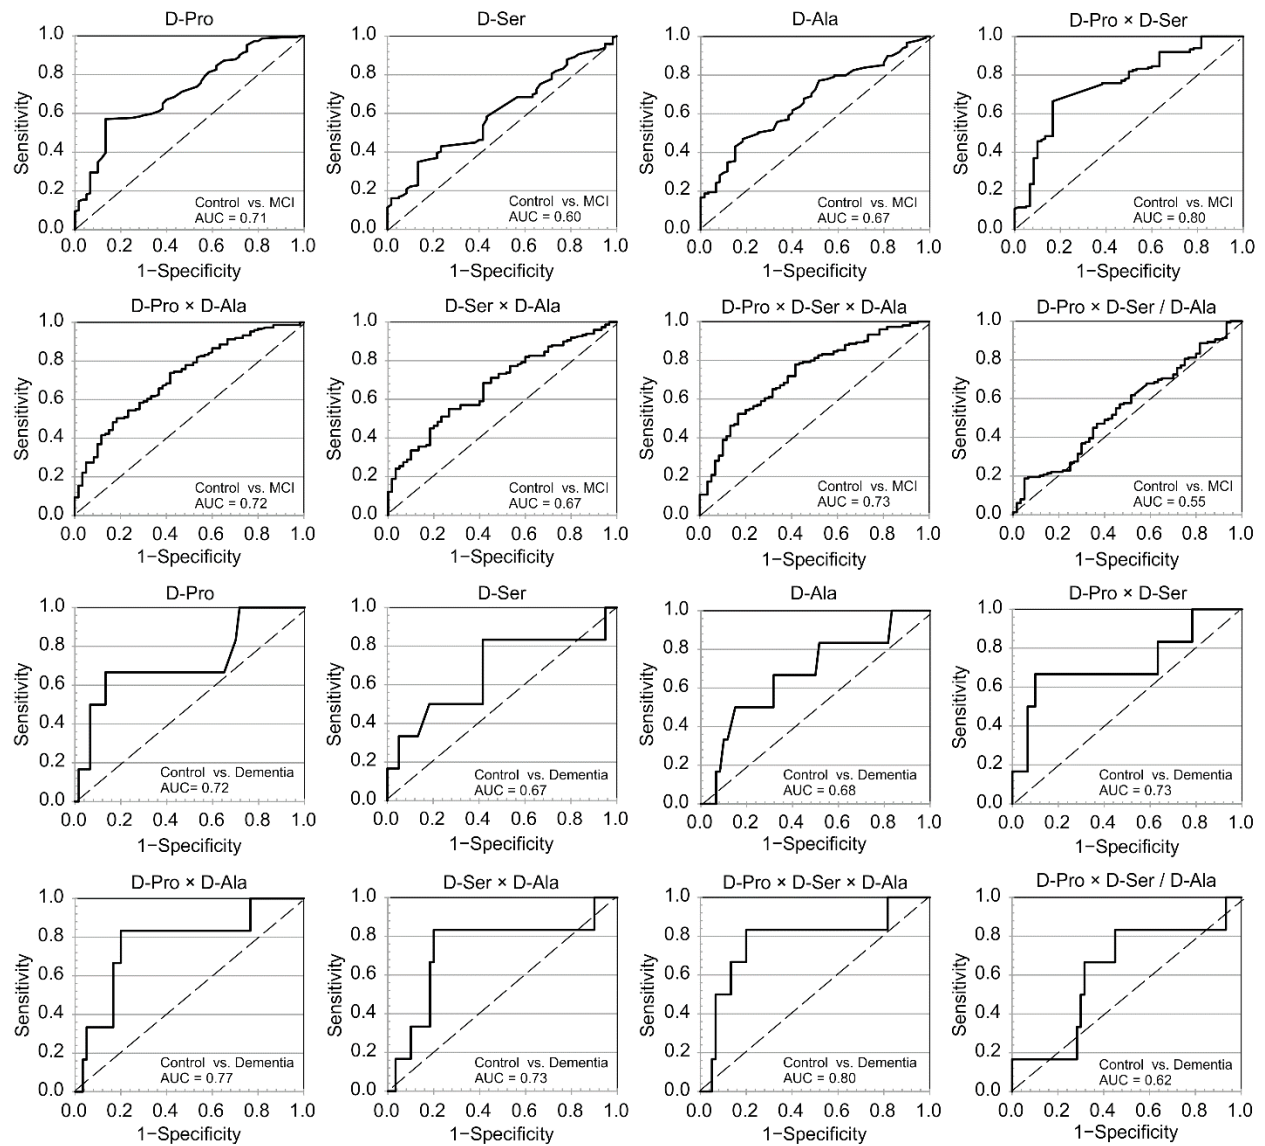

**Supplementary Figure 4.** ROC curve analysis of blood enantiomeric proportions obtained for the Control vs. MCI or Dementia groups. AUC, area under the curve.
